# Supplementary material for: Tin(ii) amide/alkoxide coordination compounds for production of Sn-based nanowires for lithium ion battery anode materials
Source: Royal Society of Chemistry journal article supplement (doi:10.1039/c2dt30772c), 2012-01-01
Supplement: c2dt30772c.pdf [file c2dt30772c.pdf]

## Supplemental Information

### Table of Contents

|                                                                          |       |
|--------------------------------------------------------------------------|-------|
| 1. Structure plots of tin alkoxides                                      |       |
| i. Heteroleptic                                                          | 02-05 |
| ii. Homoleptic                                                           | 06-09 |
| iii. Oxides                                                              | 10-12 |
| 2. Quantitative analysis of PXRD of material from solution precipitation | 13-17 |
| 3. Electrospinning Setup                                                 | 18    |

# Structure Plots of tin alkoxides: Heteroleptic

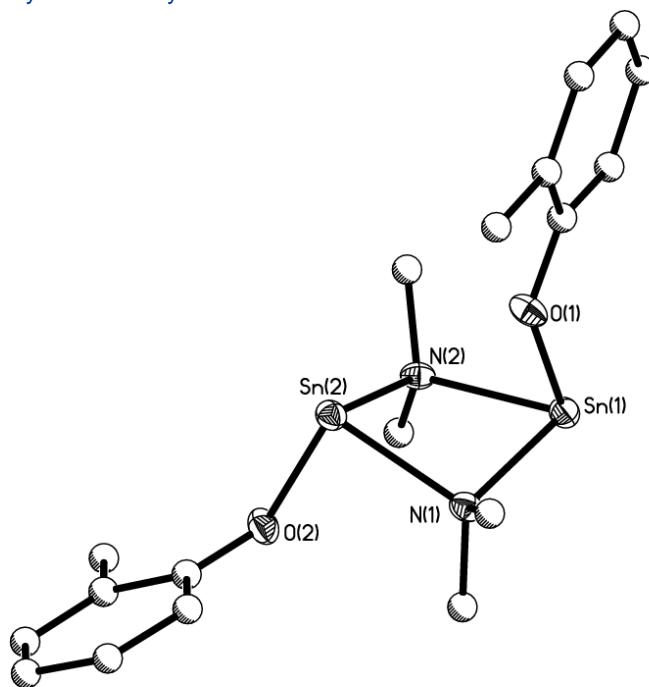

**Figure S1.** Structure plot of **1**. Thermal ellipsoids of heavy atoms are drawn at the 30% level and carbon atoms are shown as balls and sticks for clarity.

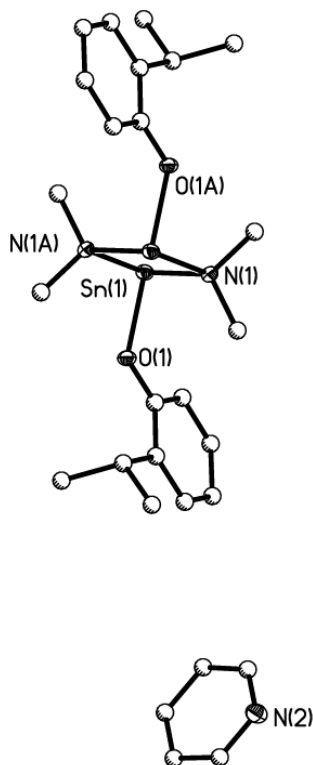

**Figure S2.** Structure plot of **2**. Thermal ellipsoids of heavy atoms are drawn at the 30% level and carbon atoms are shown as balls and sticks for clarity.

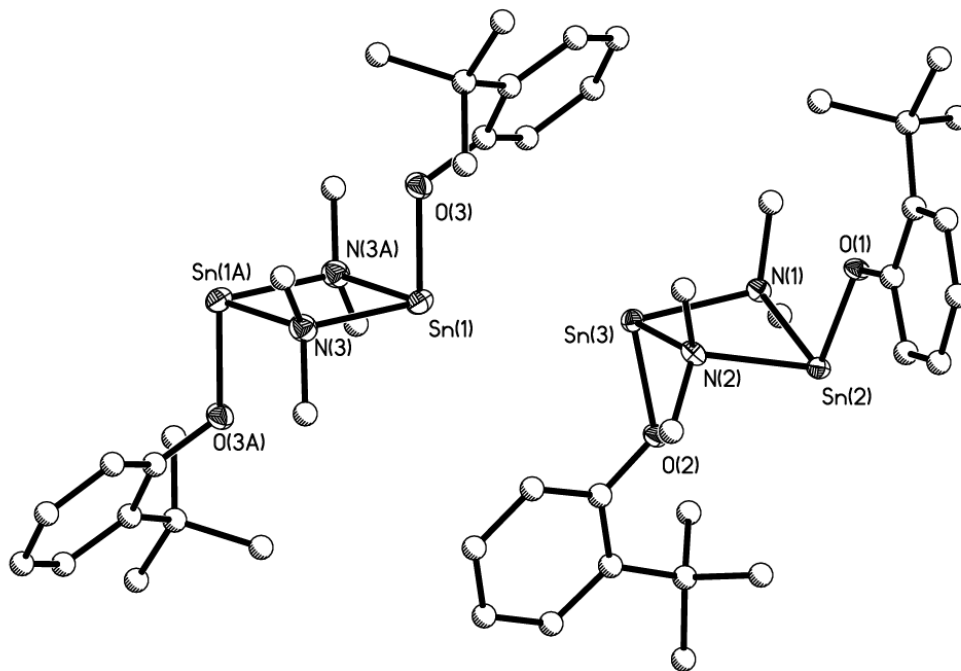

**Figure S3.** Structure plot of **3**. Thermal ellipsoids of heavy atoms are drawn at the 30% level and carbon atoms are shown as balls and sticks for clarity.

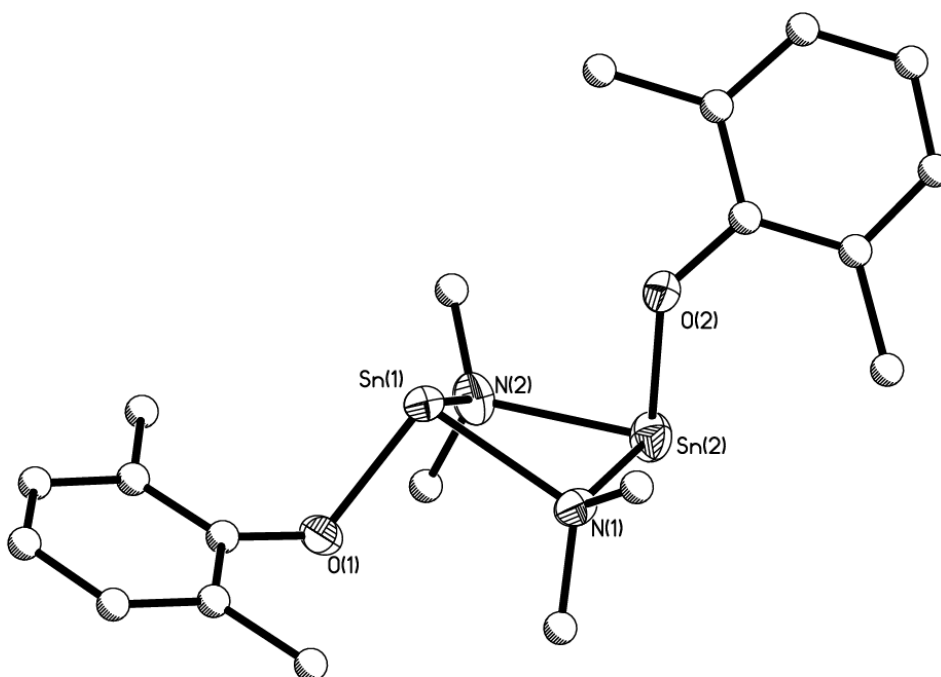

**Figure S4.** Structure plot of **4**. Thermal ellipsoids of heavy atoms are drawn at the 30% level and carbon atoms are shown as balls and sticks for clarity.

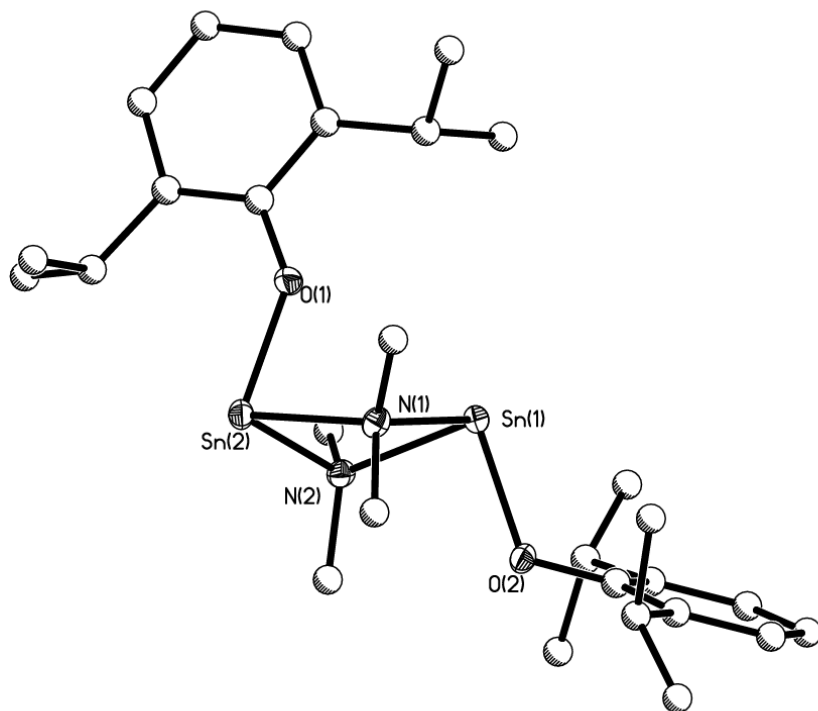

**Figure S5.** Structure plot of **5**. Thermal ellipsoids of heavy atoms are drawn at the 30% level and carbon atoms are shown as balls and sticks for clarity.

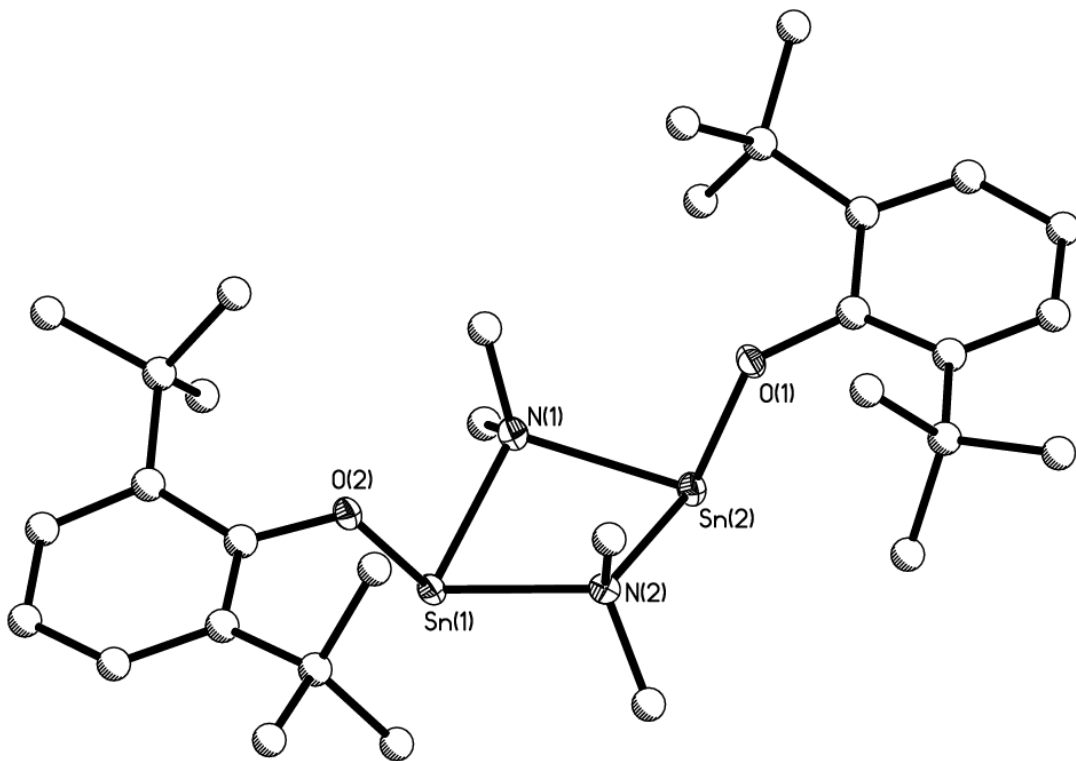

**Figure S6.** Structure plot of **6**. Thermal ellipsoids of heavy atoms are drawn at the 30% level and carbon atoms are shown as balls and sticks for clarity.

# Structure Plots of tin alkoxides : Homoleptic

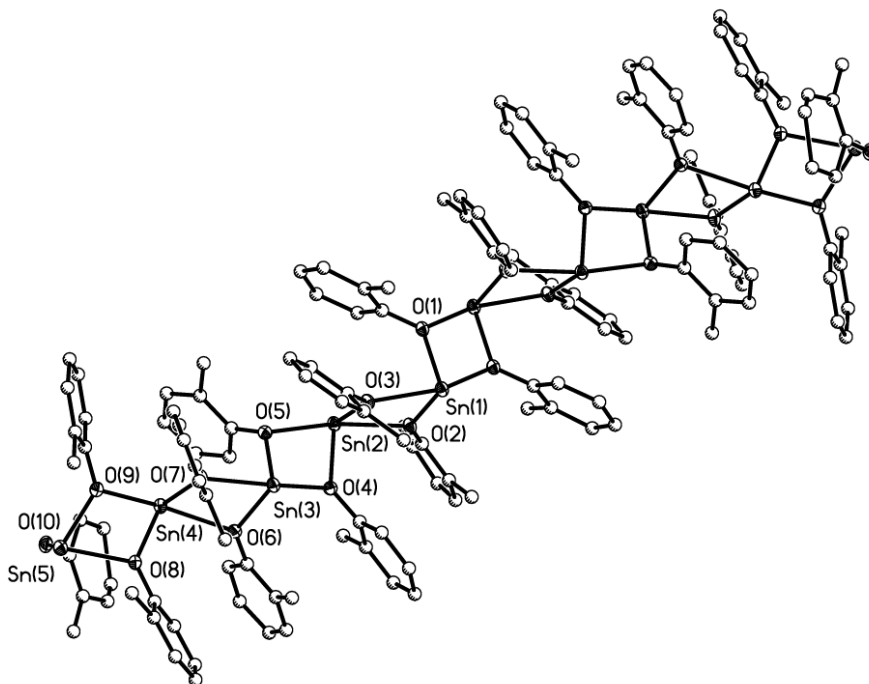

**Figure S7.** Structure plot of **7**. Thermal ellipsoids of heavy atoms are drawn at the 30% level and carbon atoms are shown as balls and sticks for clarity.

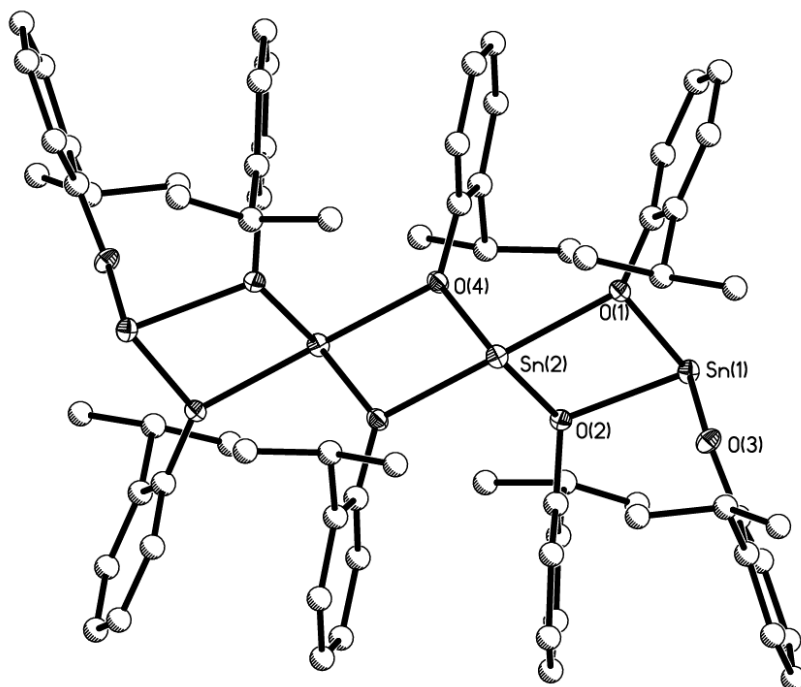

**Figure S8.** Structure plot of **8**. Thermal ellipsoids of heavy atoms are drawn at the 30% level and carbon atoms are shown as balls and sticks for clarity.

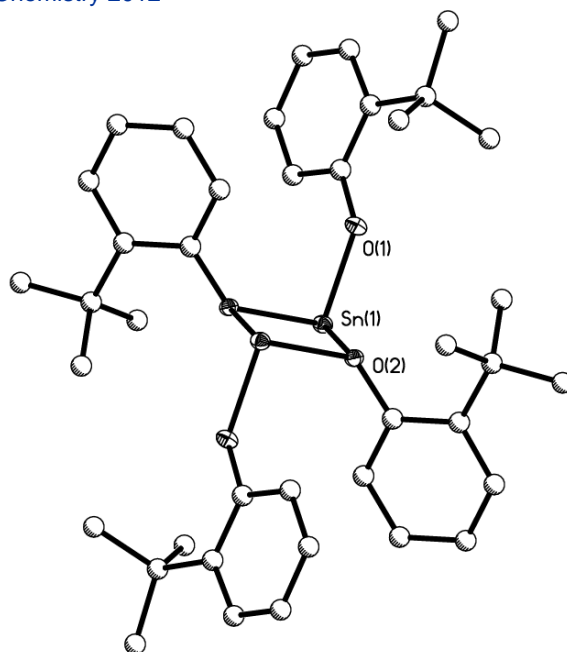

**Figure S9.** Structure plot of **9**. Thermal ellipsoids of heavy atoms are drawn at the 30% level and carbon atoms are shown as balls and sticks for clarity.

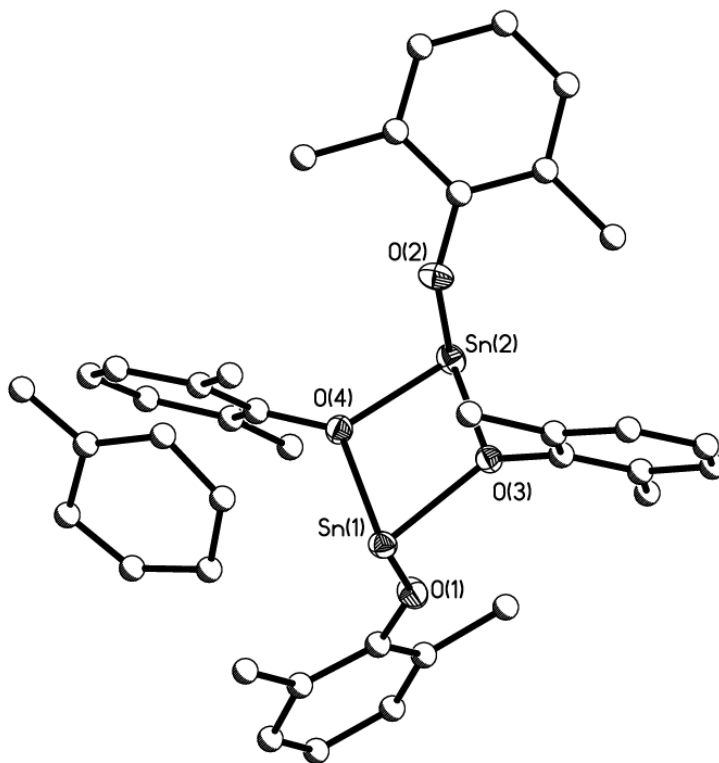

**Figure S10.** Structure plot of **10**. Thermal ellipsoids of heavy atoms are drawn at the 30% level and carbon atoms are shown as balls and sticks for clarity.



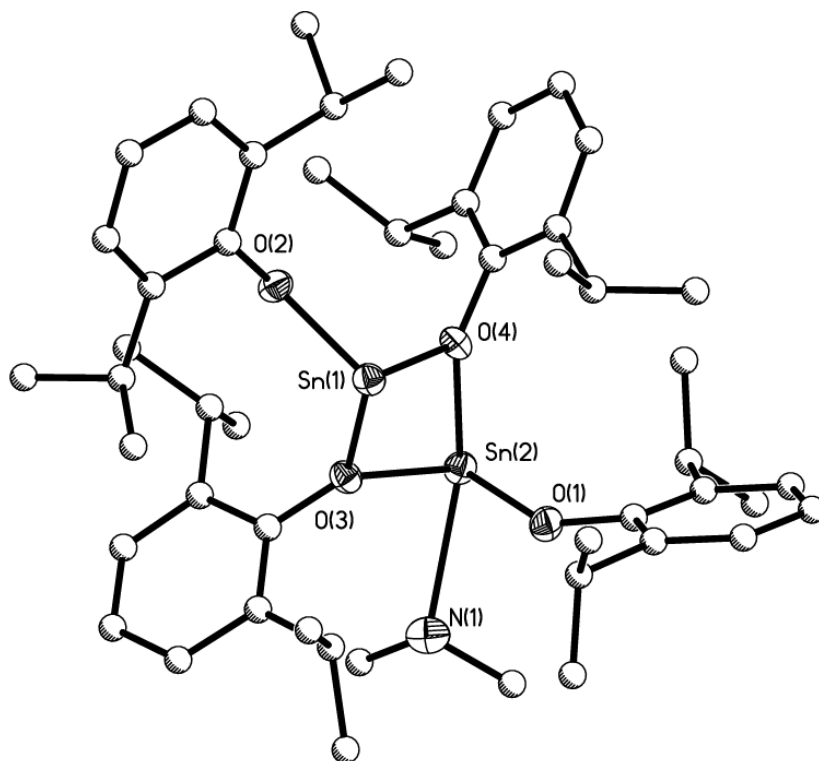

**Figure S11.** Structure plot of **11**. Thermal ellipsoids of heavy atoms are drawn at the 30% level and carbon atoms are shown as balls and sticks for clarity.

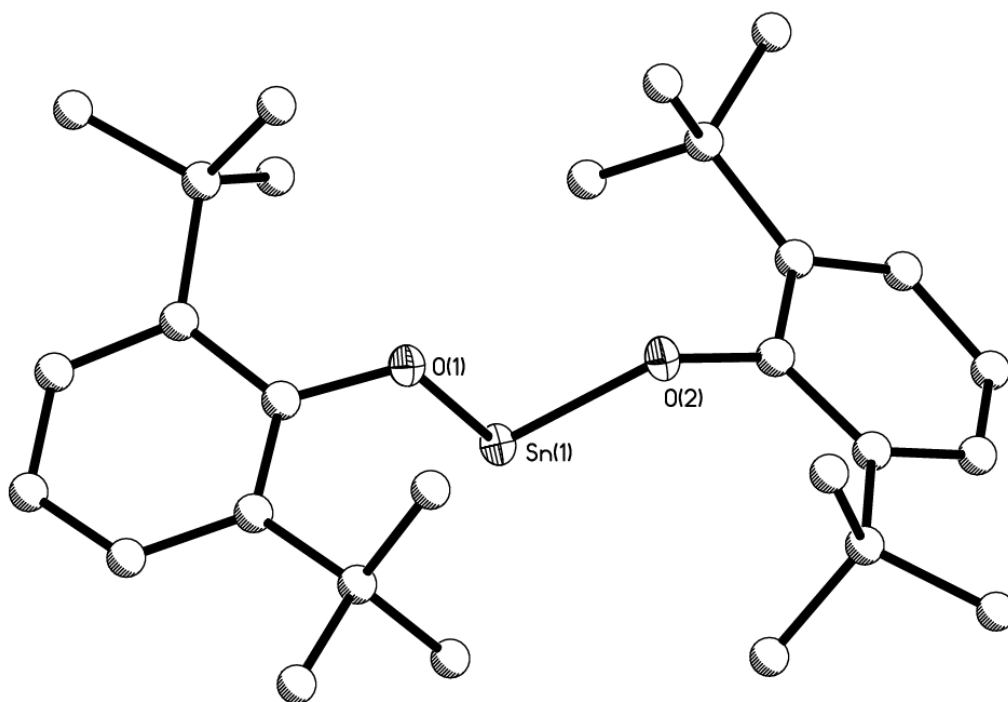

**Figure S12.** Structure plot of **12**. Thermal ellipsoids of heavy atoms are drawn at the 30% level and carbon atoms are shown as balls and sticks for clarity.

# Structure Plots of tin alkoxides: Oxides

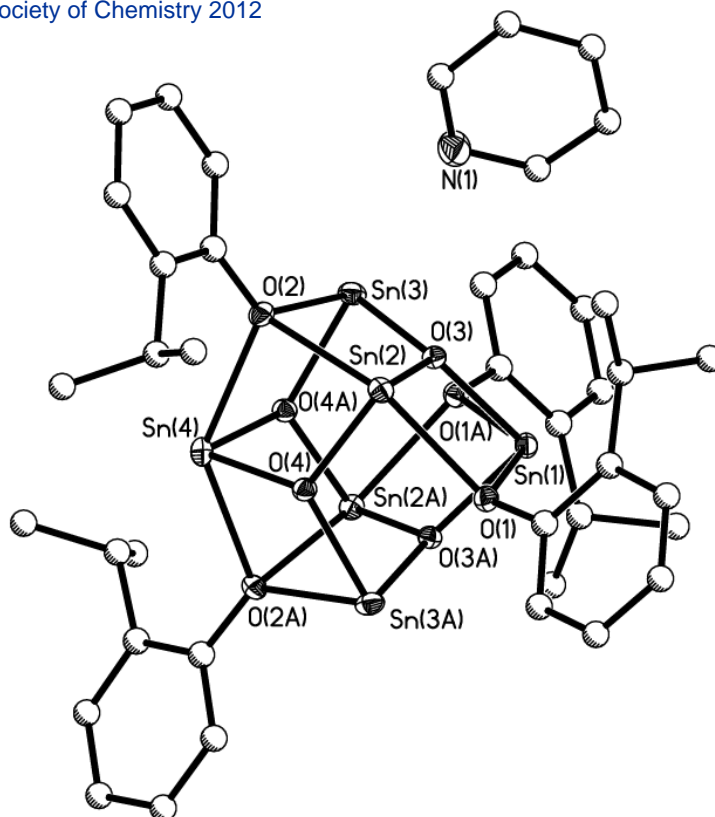

**Figure S13.** Structure plot of S1. Thermal ellipsoids of heavy atoms are drawn at the 30% level and carbon atoms are shown as balls and sticks for clarity.

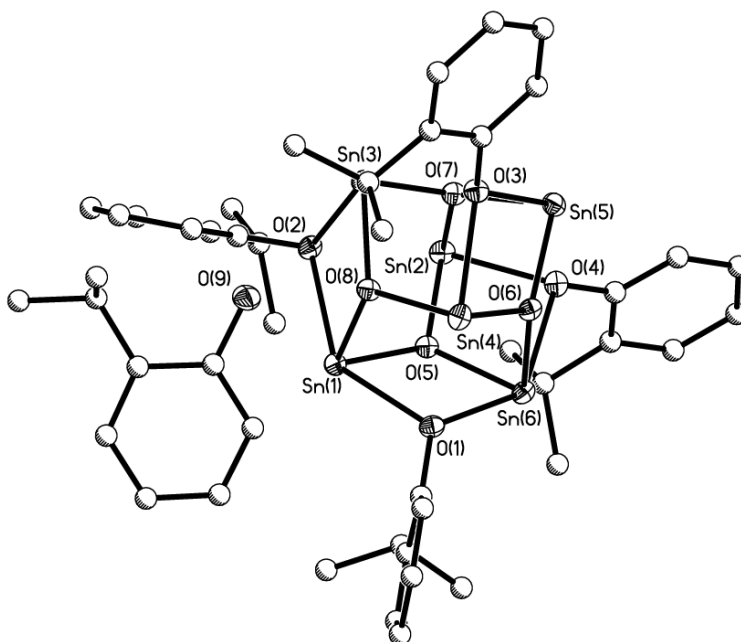

**Figure S14.** Structure plot of S2. Thermal ellipsoids of heavy atoms are drawn at the 30% level and carbon atoms are shown as balls and sticks for clarity.

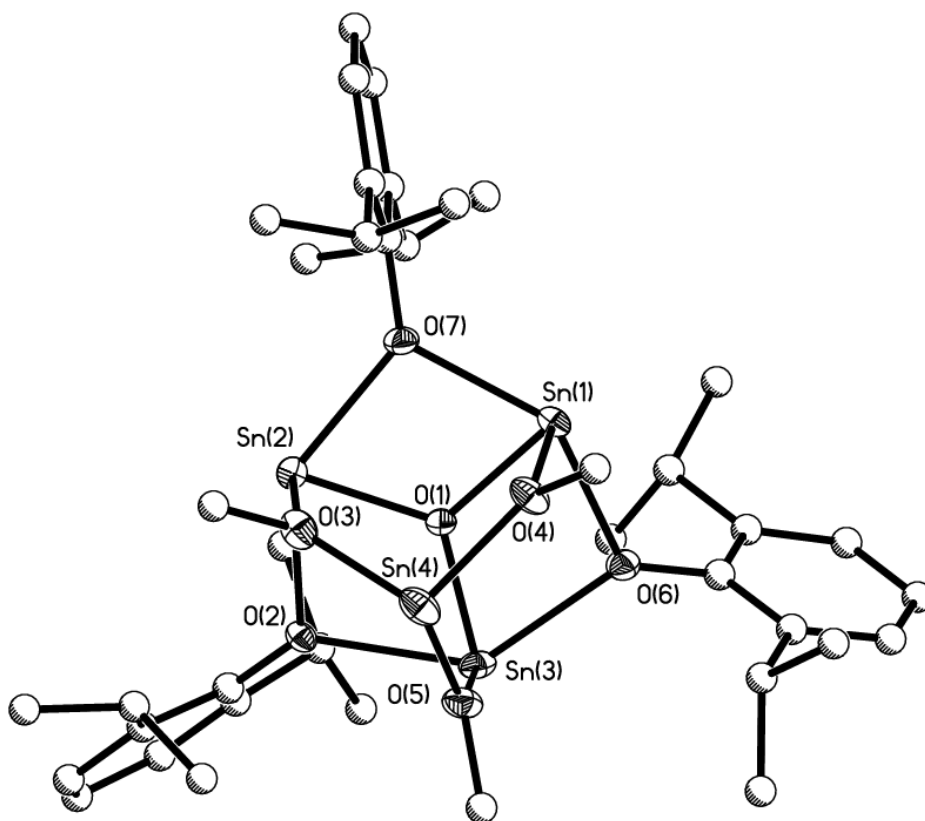

**Figure S15.** Structure plot of **S3**. Thermal ellipsoids of heavy atoms are drawn at the 30% level and carbon atoms are shown as balls and sticks for clarity.

# Quantitative analysis of PXRD of material from solution precipitation

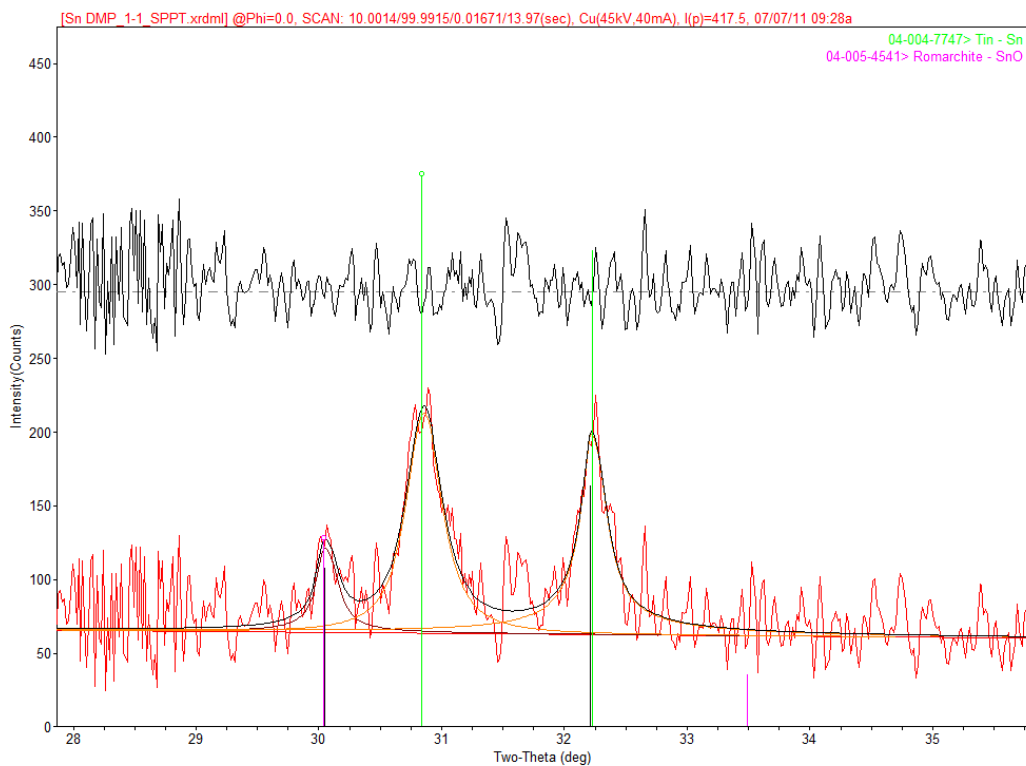

Sandia

[S930003]marodri@c:\Users\marodri\Documents\Data\customer\Doan> Thursday, July 28, 2011 04:24p (MDI/JADE9)

Tin - Sn <Wt%=85.7(30.8)>  
Romarchite - SnO <Wt%=14.3(5.1)>

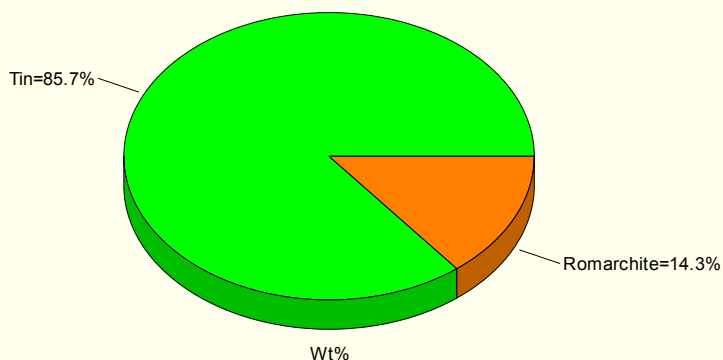

### Quantitative Analysis from Profile-Fitted Peaks

**Figure S16.** Quantitative analysis of material generated from solution precipitation of **4**. Plot (top) shows PXRD pattern for Sn and SnO fitted to experimental peaks. Graph (bottom) shows percent composition of Sn and SnO in material.

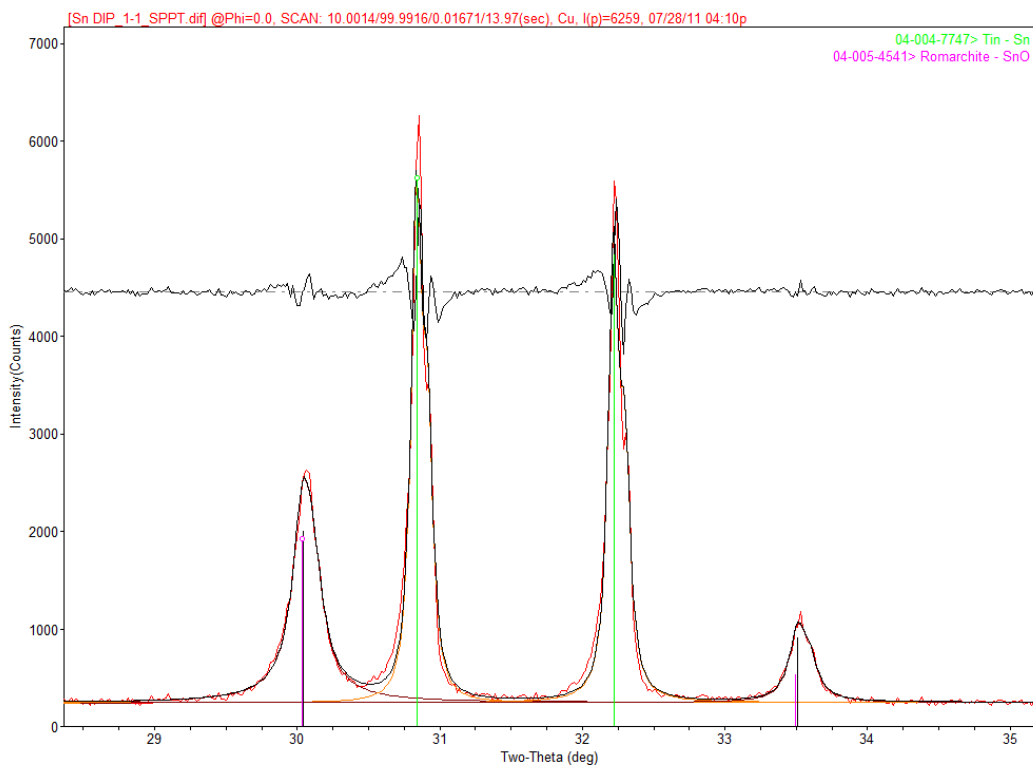

Sandia

[S930003]marodn|cc:\Users\marodn\Documents\Data\customer\Doan> Thursday, July 28, 2011 04:16p (MDI/JADE9)

Tin - Sn <Wt%=65.5(3.8)>  
Romarchite - SnO <Wt%=34.5(2.0)>

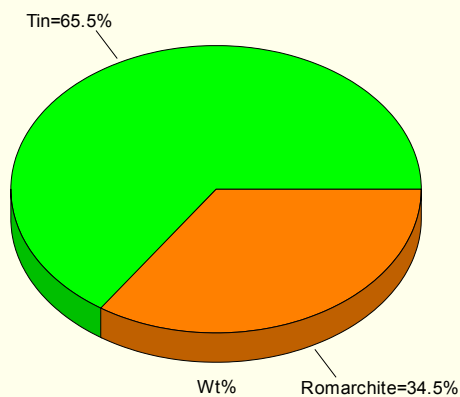

### Quantitative Analysis from Profile-Fitted Peaks

**Figure S17.** Quantitative analysis of material generated from solution precipitation of **5**. Plot (top) shows PXRD pattern for Sn and SnO fitted to experimental peaks. Graph (bottom) shows percent composition of Sn and SnO in material.

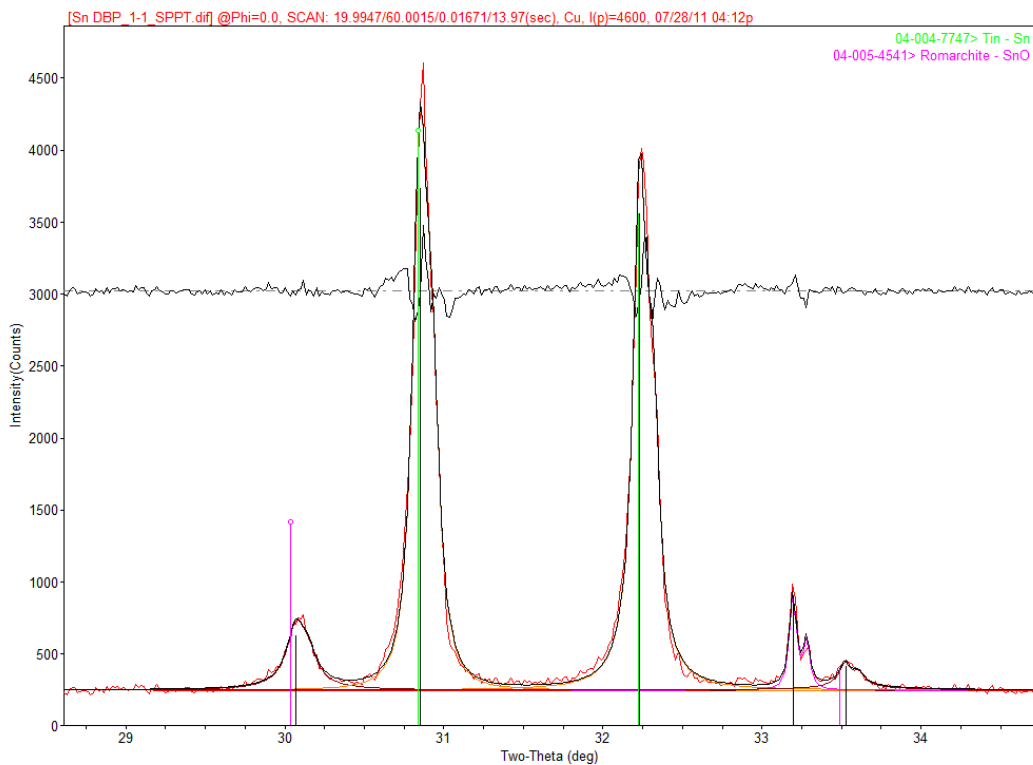

Sandia

[S930003]marodn|cc:\Users\marodn\Documents\Data\customer\Doan> Thursday, July 28, 2011 04:14p (MDI/JADE9)

Tin - Sn <Wt%=87.9(8.6)>  
Romarchite - SnO <Wt%=12.1(1.2)>

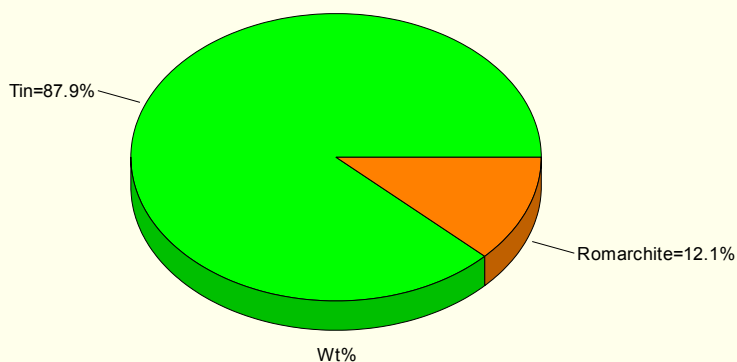

### Quantitative Analysis from Profile-Fitted Peaks

**Figure S18.** Quantitative analysis of material generated from solution precipitation of **6**. Plot (top) shows PXRD pattern for Sn and SnO fitted to experimental peaks. Graph (bottom) shows percent composition of Sn and SnO in material.



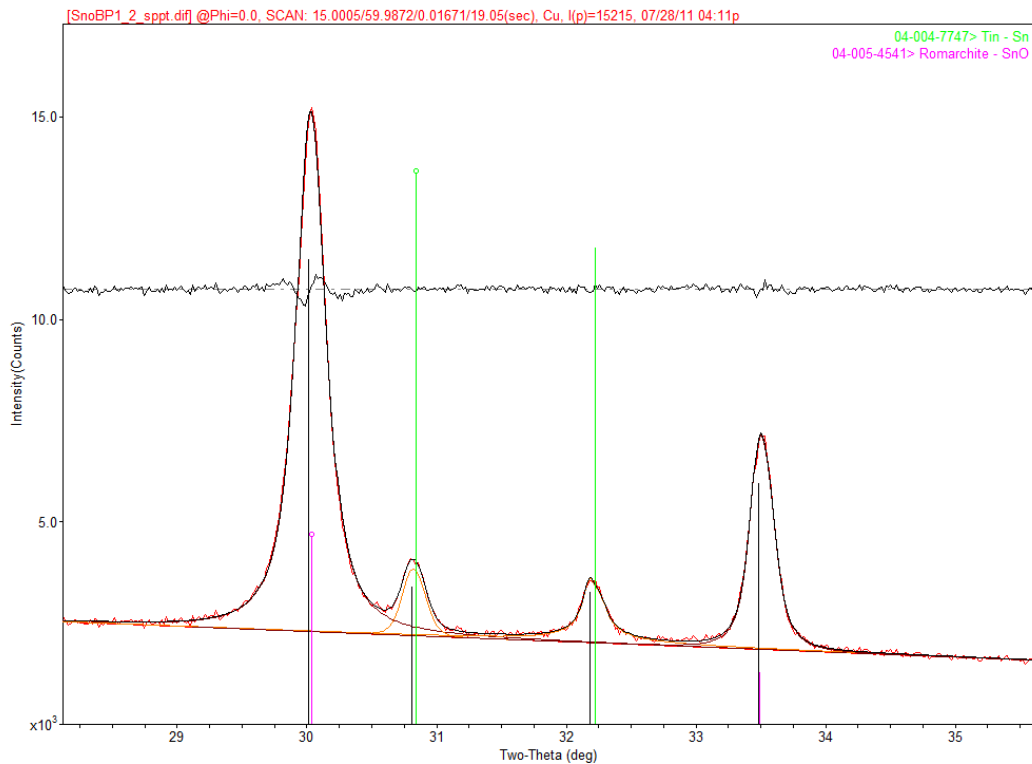

Sandia

[S930003]marodri\cc:\Users\marodri\Documents\Data\customer\Doan\ Thursday, July 28, 2011 04:20p (MDI/JADE9)

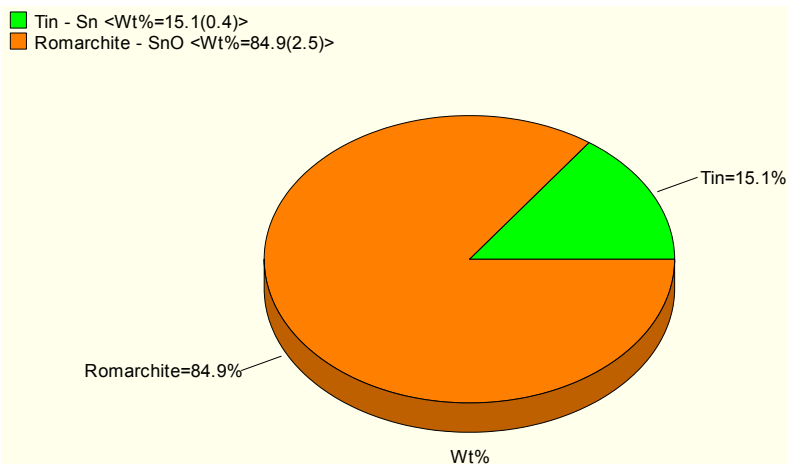

### Quantitative Analysis from Profile-Fitted Peaks

**Figure S19.** Quantitative analysis of material generated from solution precipitation of **9**. Plot (top) shows PXRD pattern for Sn and SnO fitted to experimental peaks. Graph (bottom) shows percent composition of Sn and SnO in material.

# General Electrospinning (ES) Setup

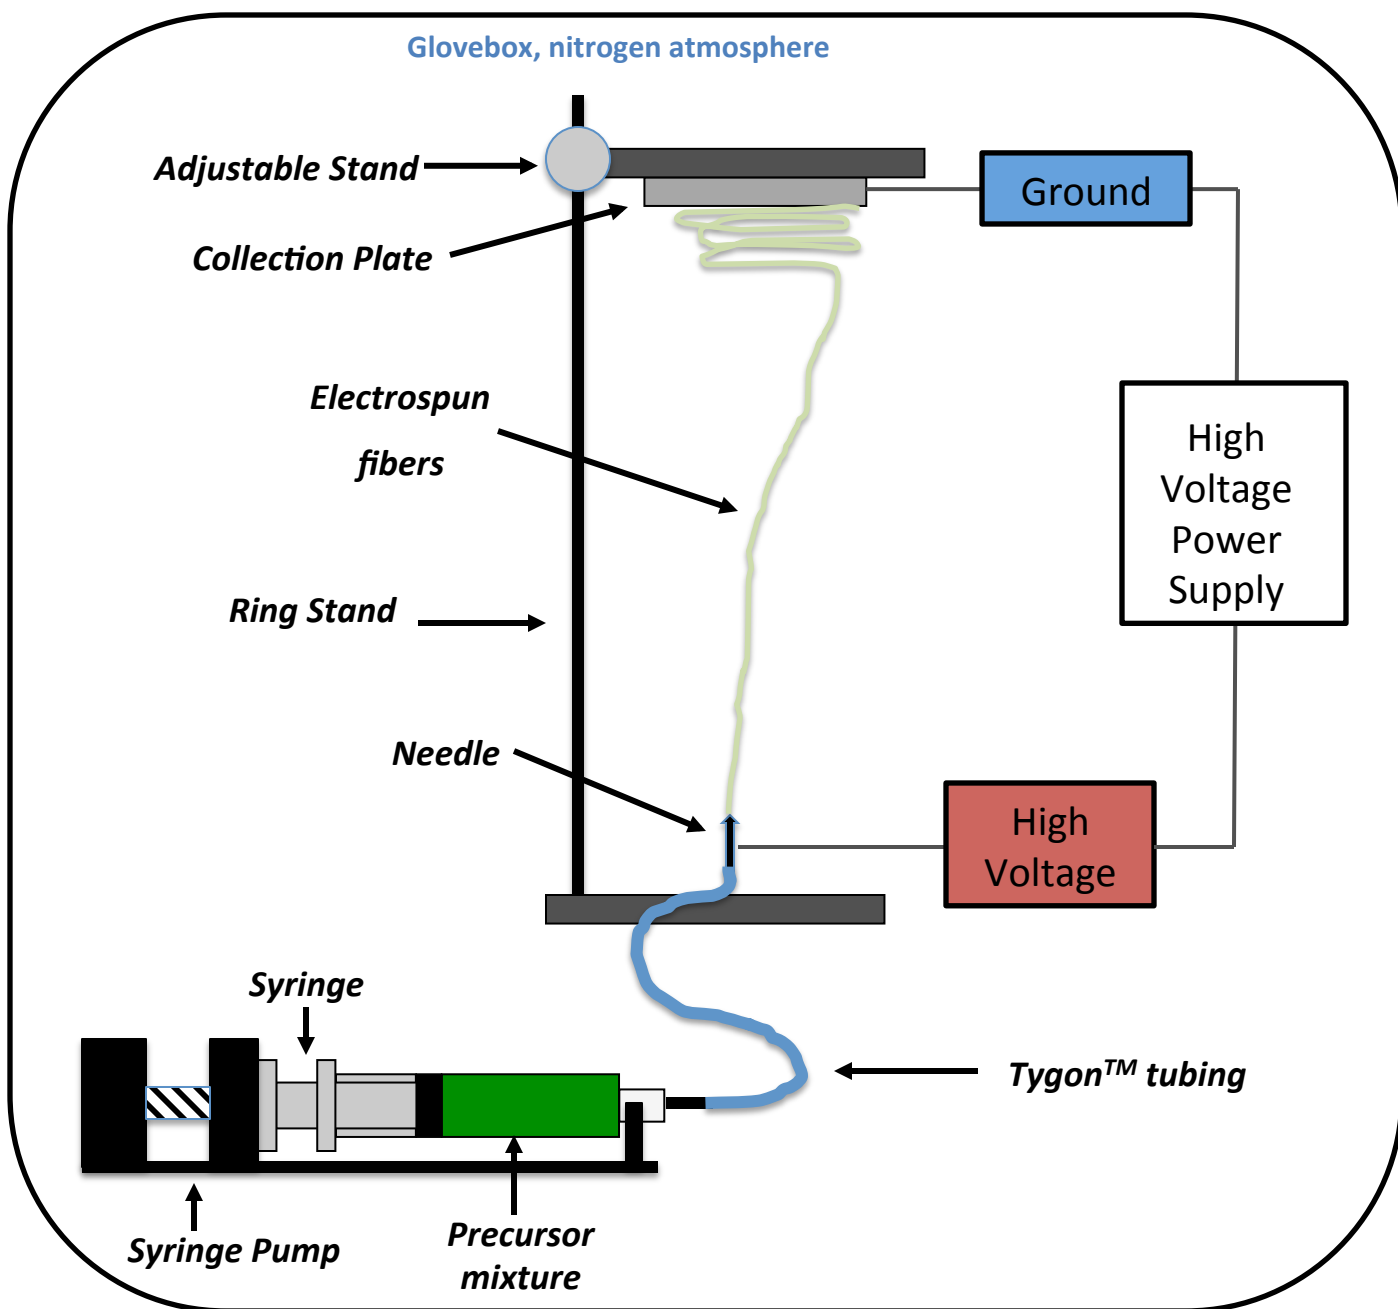

## Experimental Parameter Settings

- 0.200 mmol Precursor
- 3 mL THF
- 15 kV
- 60 mins.
- 0.9 mL/h
- 15 gauge needle
- Inverted Setup
- Nitrogen atmosphere

Figure S20. Electrospinning setup with labeled components and experimental parameters
